# Supplementary material
Source: HighWire-hosted journal article supplement (https://www.cmajopen.ca/highwire/filestream/89163/field_highwire_adjunct_files/4/open-2021-0118-5-at.pdf)
Supplement: open-2021-0118-5-at.pdf [file open-2021-0118-5-at.pdf]

Flow diagram of control cohort selection criteria and algorithm for matching to hand trauma cases. Note: ADG = aggregated diagnosis groups, OHIP = Ontario Health Insurance Program, RPDB = Registered Persons Database.

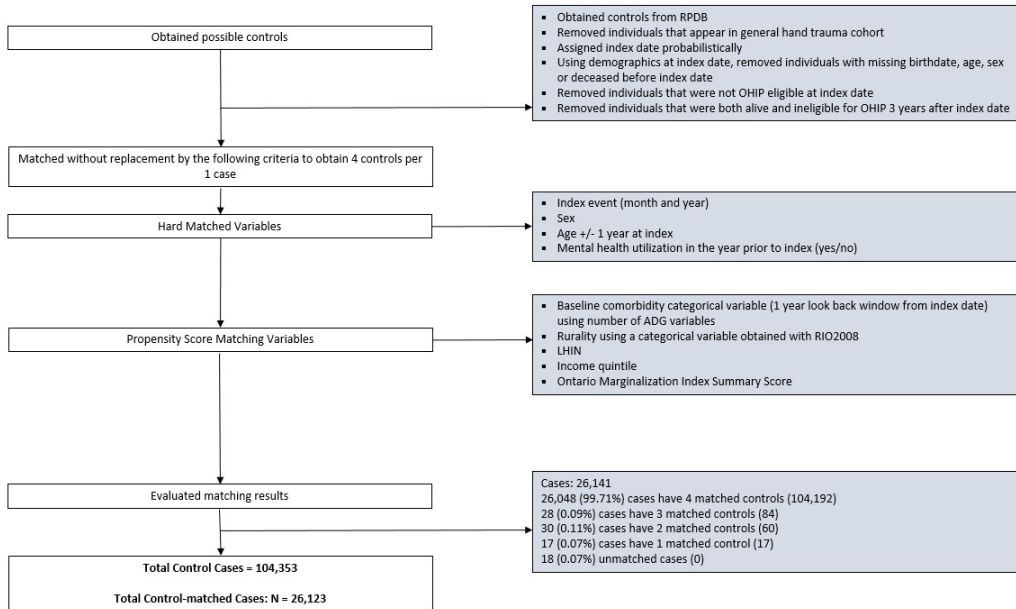

Appendix 5, as supplied by the authors. Appendix to: Baltzer HL, Hawker G, Pequeno P, et al. A population-based study of the direct longitudinal health care costs of upper extremity trauma in patients aged 18–65 years. *CMAJ Open* 2023. doi: 10.9778/cmajo.20210118.

Copyright © 2023 The Author(s) or their employer(s). To receive this resource in an accessible format, please contact us at [cmajgroup@cmaj.ca](mailto:cmajgroup@cmaj.ca).
